# Supplementary material for: Photophysical studies of a room temperature phosphorescent Cd(ii) based MOF and its application towards ratiometric detection of Hg2+ ions in water
Source: Royal Society of Chemistry journal article supplement (doi:10.1039/d1ce00333j), 2021-01-01
Supplement: d1ce00333j1.pdf [file d1ce00333j1.pdf]

**Photophysical Studies of a Room Temperature Phosphorescent Cd(II)  
based MOF and its Application towards Ratiometric Detection of Hg<sup>2+</sup> Ions  
in Water**

Prakash Majee,<sup>a</sup> Debal Kanti Singha,<sup>a,b</sup> Pooja Daga,<sup>a</sup> Sayani Hui,<sup>b</sup> Partha Mahata<sup>b\*</sup> and Sudip  
Kumar Mondal<sup>a\*</sup>

<sup>a</sup>Department of Chemistry, Siksha-Bhavana, Visva-Bharati University, Santiniketan-731235, West Bengal,  
India. Email: [sudip.mondal@visva-bharati.ac.in](mailto:sudip.mondal@visva-bharati.ac.in)

<sup>b</sup>Department of Chemistry, Jadavpur University, Jadavpur, Kolkata-700 032, West Bengal, India.  
Email: [parthachem@gmail.com](mailto:parthachem@gmail.com)

**ELECTRONIC SUPPLEMENTARY INFORMATION**

---

\* Corresponding Authors, E-mail: [sudip.mondal@visva-bharati.ac.in](mailto:sudip.mondal@visva-bharati.ac.in), [parthachem@gmail.com](mailto:parthachem@gmail.com)

**Table S1:** Selected bond distances (Å) observed in [Cd(C<sub>5</sub>N<sub>1</sub>S<sub>1</sub>H<sub>4</sub>)(C<sub>6</sub>O<sub>5</sub>H<sub>3</sub>)], **Cd\_1**.

| Bond         | Distances, Å | Bond         | Distances, Å |
|--------------|--------------|--------------|--------------|
| Cd(1)-O(1)   | 2.303(3)     | Cd(1)-O(2)   | 2.623(4)     |
| Cd(1)-O(3)#1 | 2.335(3)     | Cd(1)-S(1)   | 2.5417(10)   |
| Cd(1)-O(4)#1 | 2.411(3)     | Cd(1)-S(1)#2 | 2.7194(10)   |

Symmetry transformations used to generate equivalent atoms: #1  $x-1/2, -y+1/2, z-1/2$  #2  $x+1, y, z$

**Table S2:** Selected bond angles observed in [Cd(C<sub>5</sub>N<sub>1</sub>S<sub>1</sub>H<sub>4</sub>)(C<sub>6</sub>O<sub>5</sub>H<sub>3</sub>)], **Cd\_1**.

| Angle               | Amplitude (°) | Angle               | Amplitude (°) |
|---------------------|---------------|---------------------|---------------|
| O(1)-Cd(1)-O(3)#1   | 122.35(11)    | O(4)#1-Cd(1)-O(2)   | 102.79(11)    |
| O(1)-Cd(1)-O(4)#1   | 152.32(12)    | S(1)-Cd(1)-O(2)     | 147.10(7)     |
| O(3)#1-Cd(1)-O(4)#1 | 55.54(10)     | O(1)-Cd(1)-S(1)#2   | 77.98(8)      |
| O(1)-Cd(1)-S(1)     | 94.68(8)      | O(3)#1-Cd(1)-S(1)#2 | 134.21(8)     |
| O(3)#1-Cd(1)-S(1)   | 121.62(9)     | O(4)#1-Cd(1)-S(1)#2 | 87.05(8)      |
| O(4)#1-Cd(1)-S(1)   | 109.47(8)     | S(1)-Cd(1)-S(1)#2   | 93.34(3)      |
| O(1)-Cd(1)-O(2)     | 52.45(10)     | O(2)-Cd(1)-S(1)#2   | 81.86(8)      |
| O(3)#1-Cd(1)-O(2)   | 82.12(10)     |                     |               |

Symmetry transformations used to generate equivalent atoms: #1  $x-1/2, -y+1/2, z-1/2$  #2  $x+1, y, z$

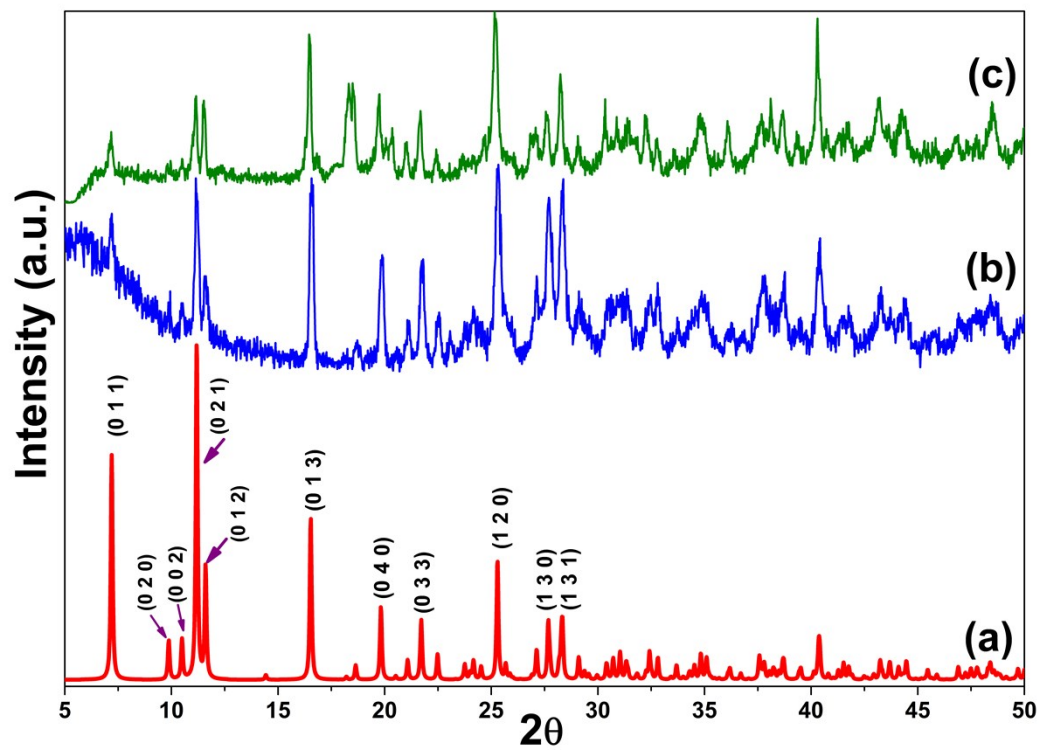

Fig. S1: Powder XRD ( $\text{CuK}\alpha$ ) patterns of  $[\text{Cd}(\text{C}_5\text{N}_1\text{S}_1\text{H}_4)(\text{C}_6\text{O}_5\text{H}_3)]$ , **Cd\_1**: (a) simulated pattern from single crystal X-ray data (b) experimental data (c) after immersing in  $\text{Hg}^{2+}$  for 24 hours.

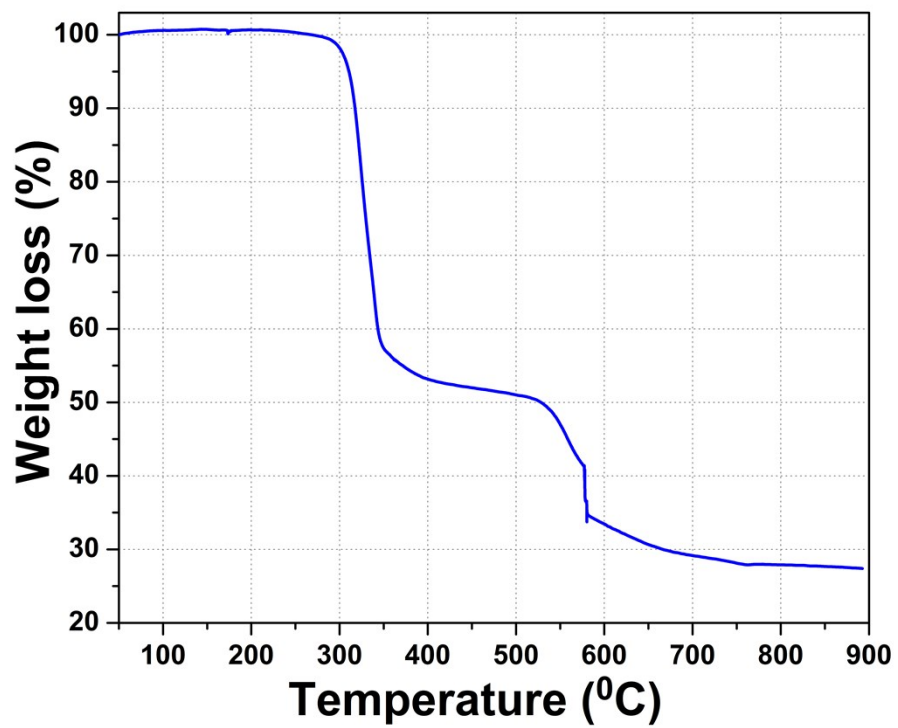

Fig. S2: Thermogravimetric analysis (TGA) of [Cd(C<sub>5</sub>N<sub>1</sub>S<sub>1</sub>H<sub>4</sub>)(C<sub>6</sub>O<sub>5</sub>H<sub>3</sub>)], Cd<sub>1</sub>, in nitrogen atmosphere.

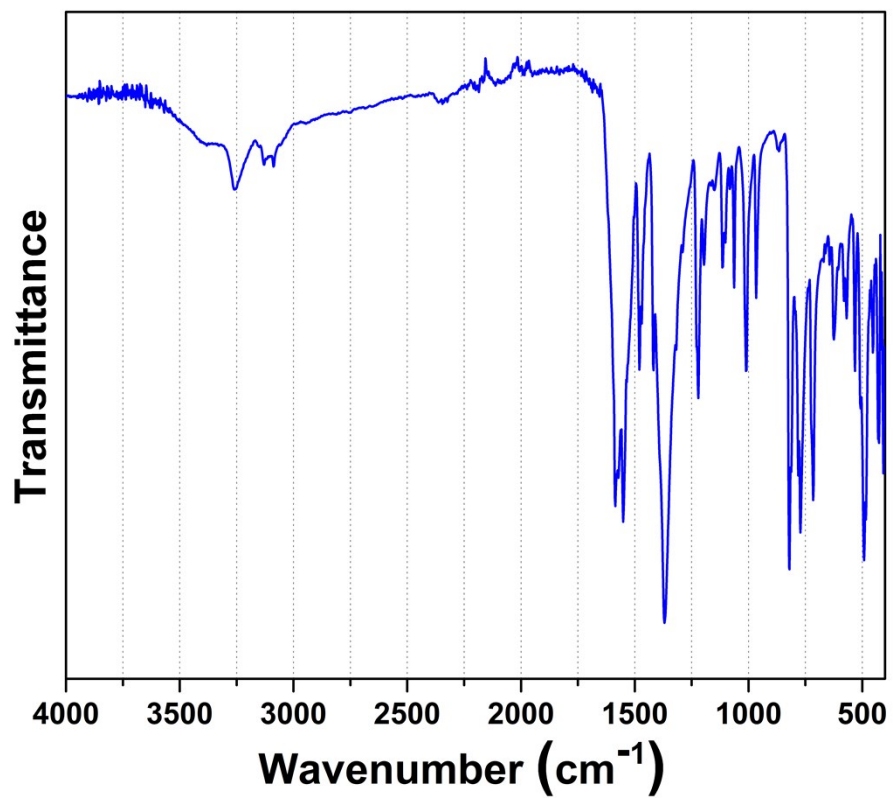

Fig. S3: IR spectrum of  $[\text{Cd}(\text{C}_5\text{N}_1\text{S}_1\text{H}_4)(\text{C}_6\text{O}_5\text{H}_3)]$ , Cd\_1.

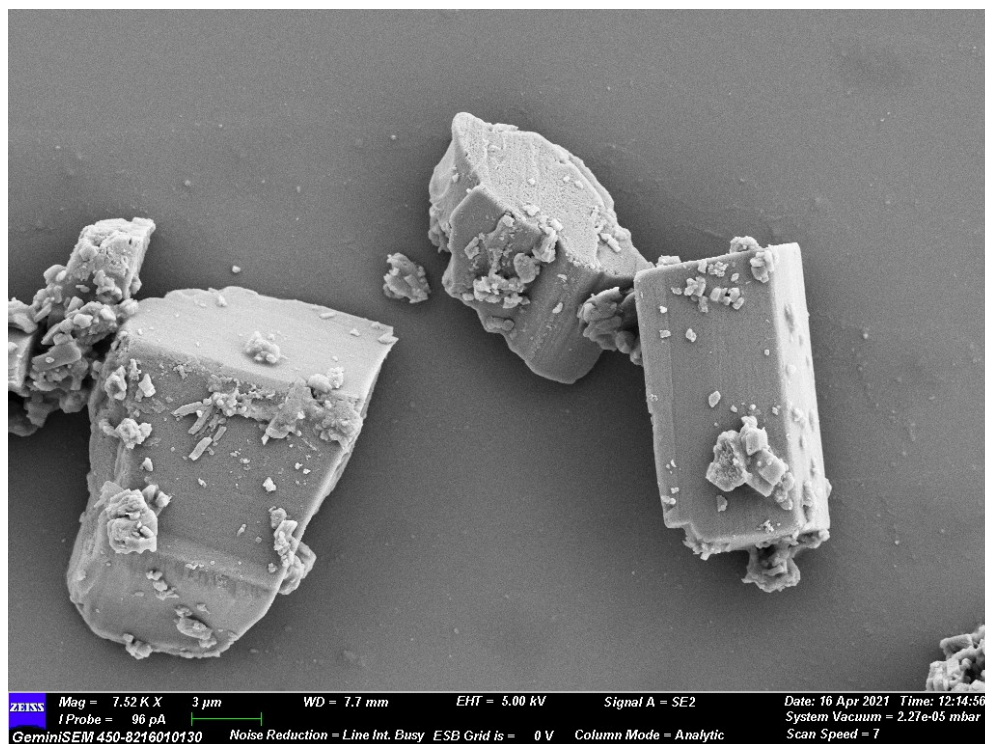

Fig. S4: SEM image of  $[\text{Cd}(\text{C}_5\text{N}_1\text{S}_1\text{H}_4)(\text{C}_6\text{O}_5\text{H}_3)]$ , Cd\_1.

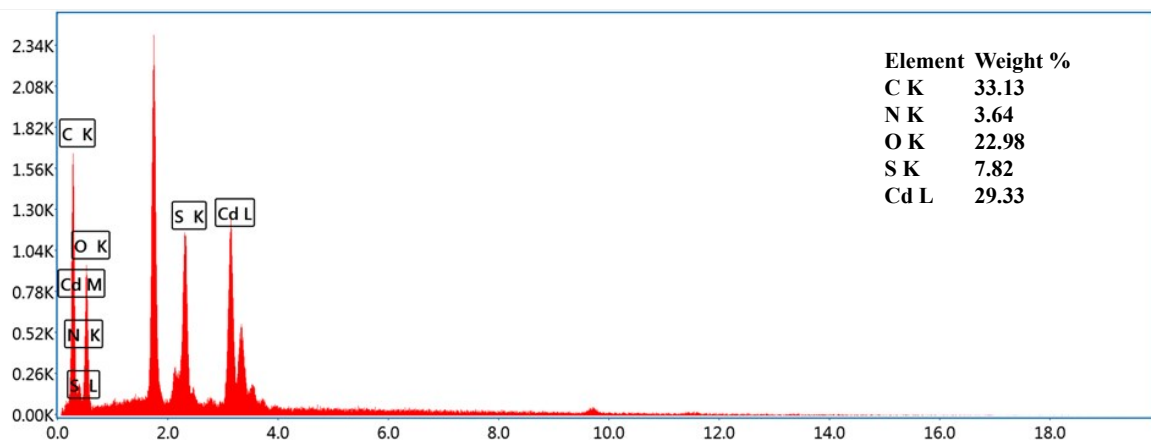

Fig. S5: Representative EDX plot of  $[\text{Cd}(\text{C}_5\text{N}_1\text{S}_1\text{H}_4)(\text{C}_6\text{O}_5\text{H}_3)]$ , Cd\_1.

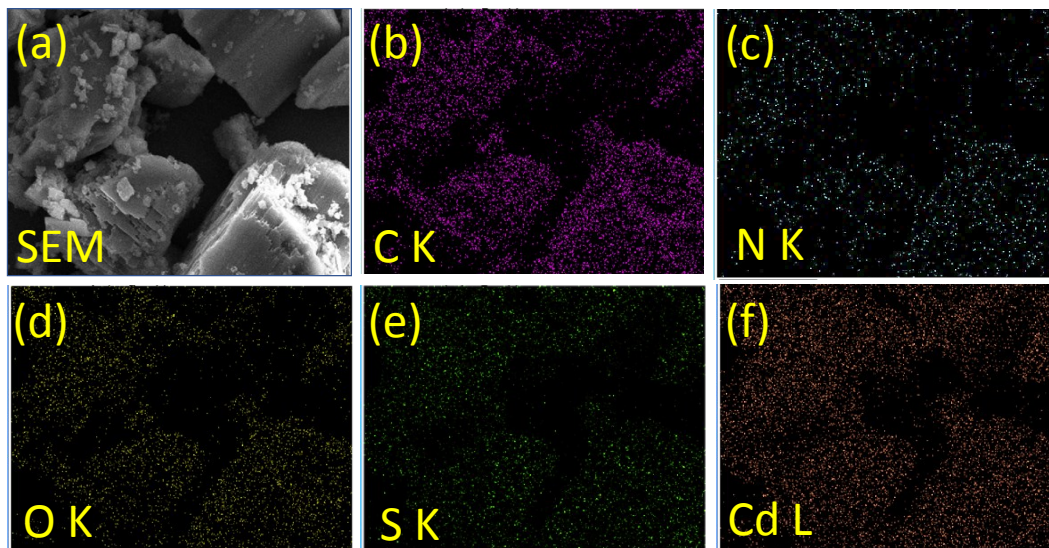

Fig. S6: (a) SEM image in which elemental mapping is performed in Cd<sub>1</sub> and elemental mapping images, (b) C K, (c) N K, (d) O K (e) S K and (f) Cd L.



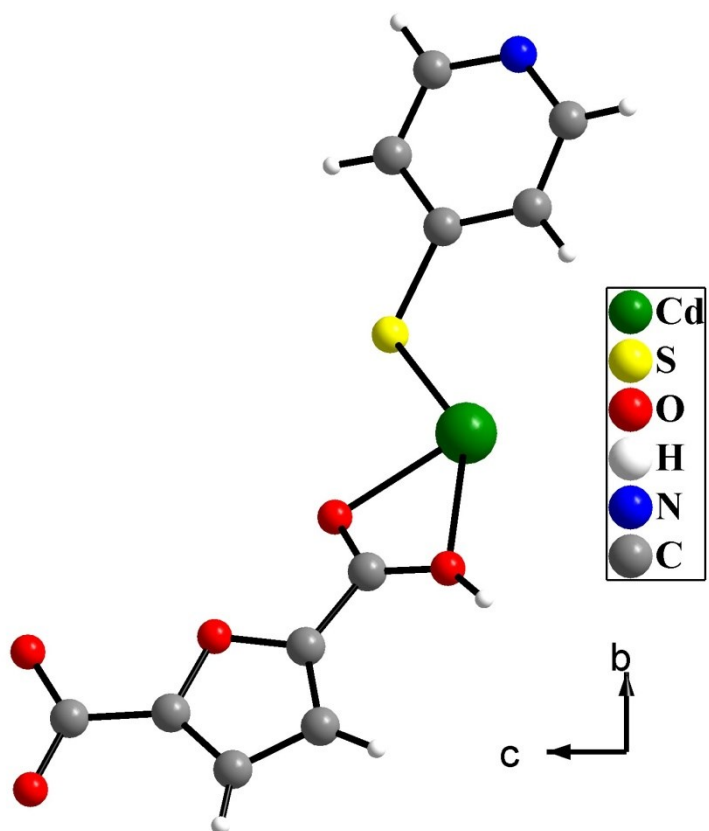

Fig. S7: Figure shows asymmetric unit of  $[\text{Cd}(\text{C}_5\text{N}_1\text{S}_1\text{H}_4)(\text{C}_6\text{O}_5\text{H}_3)]$ , **Cd\_1**.

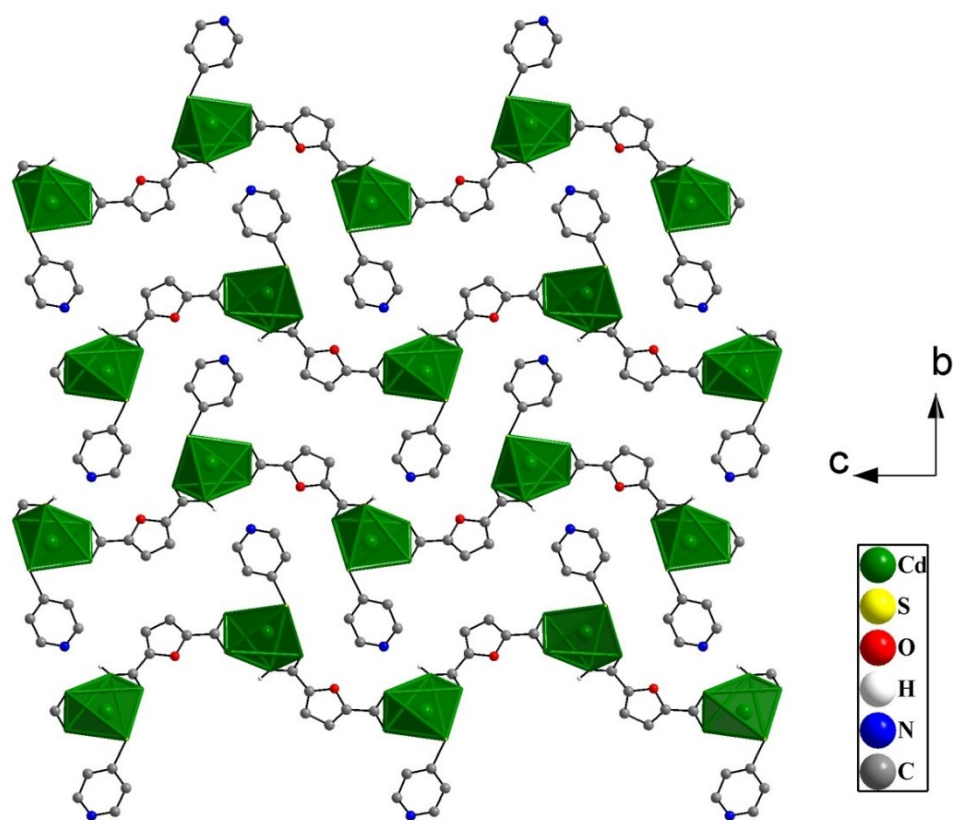

Fig. S8: Figure shows arrangement of the two-dimensional structures in *ABAB*....fashion in  $[\text{Cd}(\text{C}_5\text{N}_1\text{S}_1\text{H}_4)(\text{C}_6\text{O}_5\text{H}_3)]$ , Cd\_1.

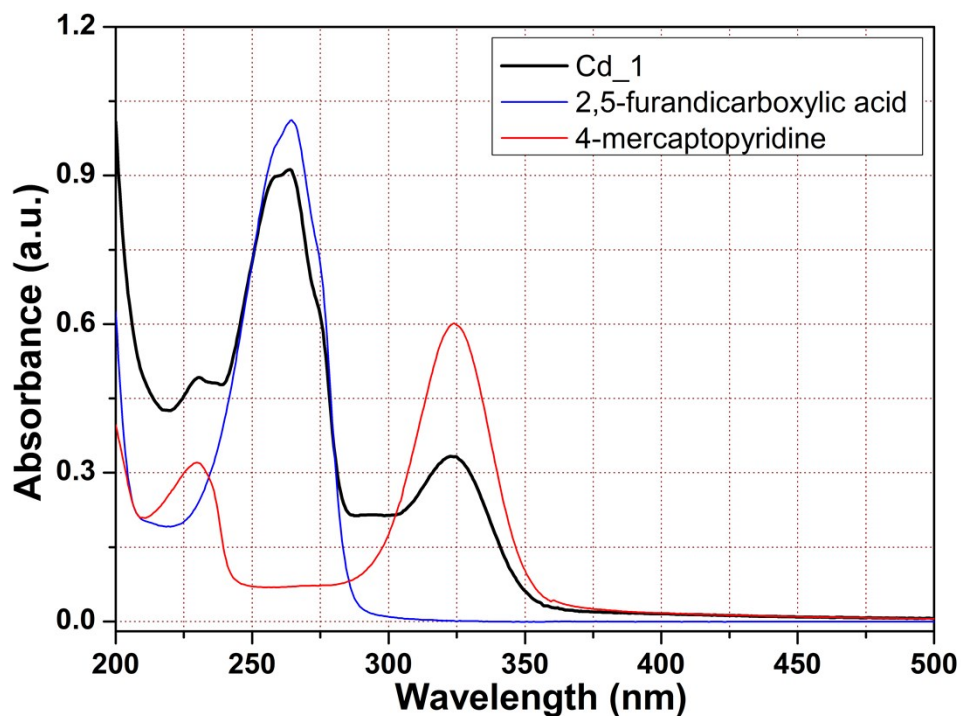

Fig. S9: Absorption spectra of compound **Cd\_1** and corresponding ligands (furan-2,5-dicarboxylic acid and aldrithiol-4). The absorption band at  $\sim 325$  nm which get diminished with the gradual addition of  $\text{Hg}^{2+}$  ions, is actually originated from the mercaptopyridine (4MPyH) moiety. The band ( $\sim 325$  nm) is most probably due to the  $n-\pi^*$  (HOMO to LUMO) transition (non-bonding electron of pyridine N get excited to the  $\pi^*$  orbital of ring carbon). With the addition of  $\text{Hg}^{2+}$  the non-bonding electrons of pyridine N get involved in the interaction with  $\text{Hg}^{2+}$  ions. As a result, the  $n-\pi^*$  transition ( $\sim 325$  nm) get diminished. This is also a clear indication that the  $\text{Hg}^{2+}$  ions interacts with the N atom of pyridine moiety.

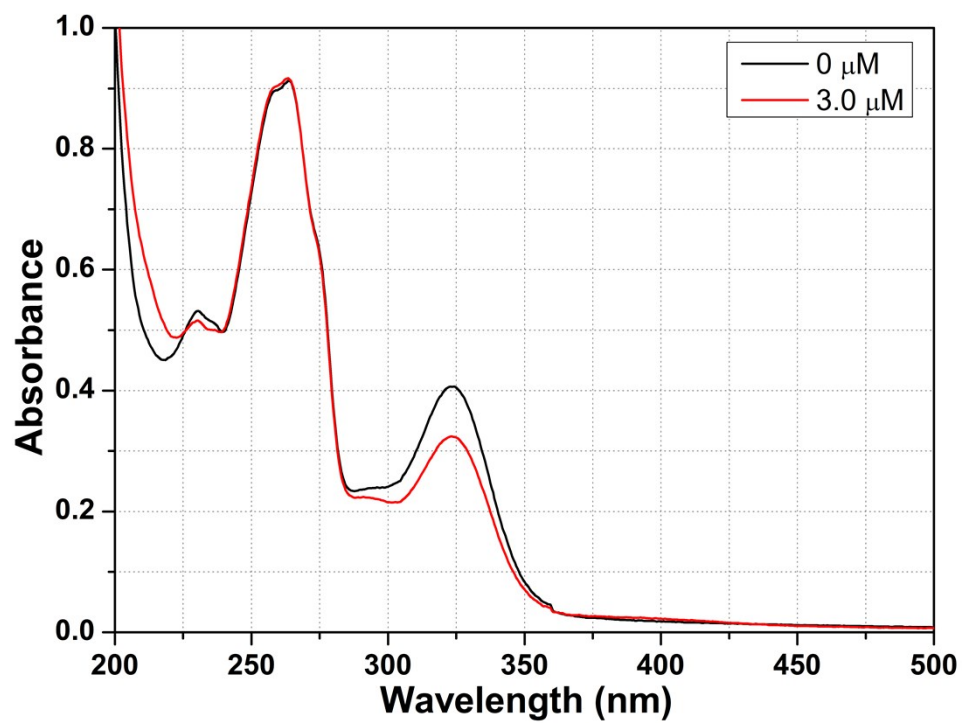

Fig. S10: Absorption of compound Cd<sub>1</sub> and changes in spectra after the addition of Pb<sup>2+</sup> (3 μM).

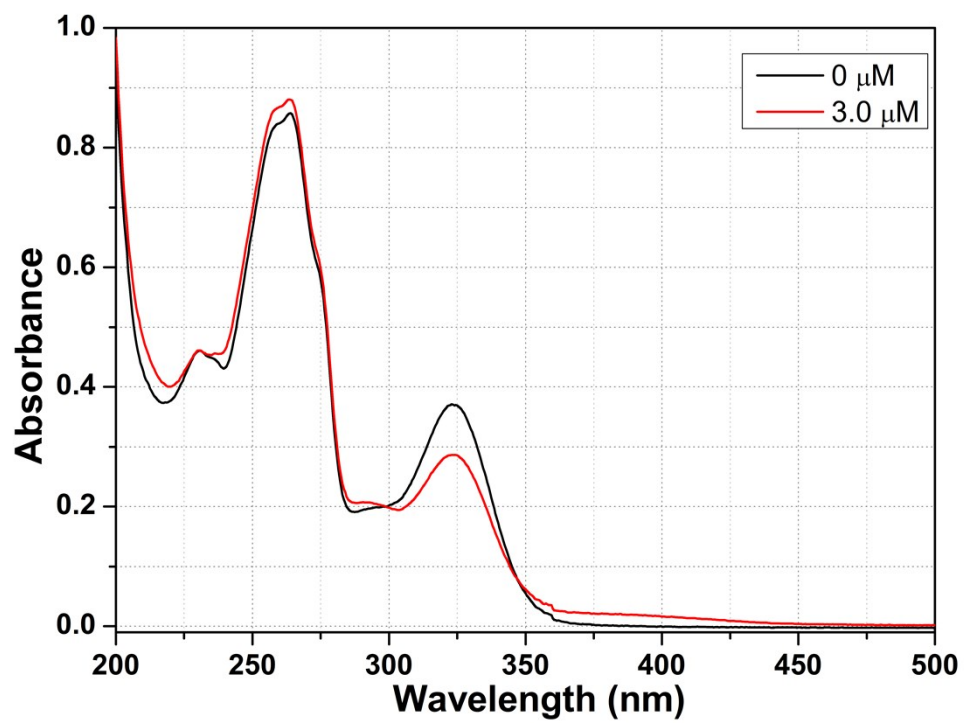

Fig. S11: Absorption of compound Cd<sub>1</sub> and changes in spectra after the addition of Cu<sup>2+</sup> (3 μM).

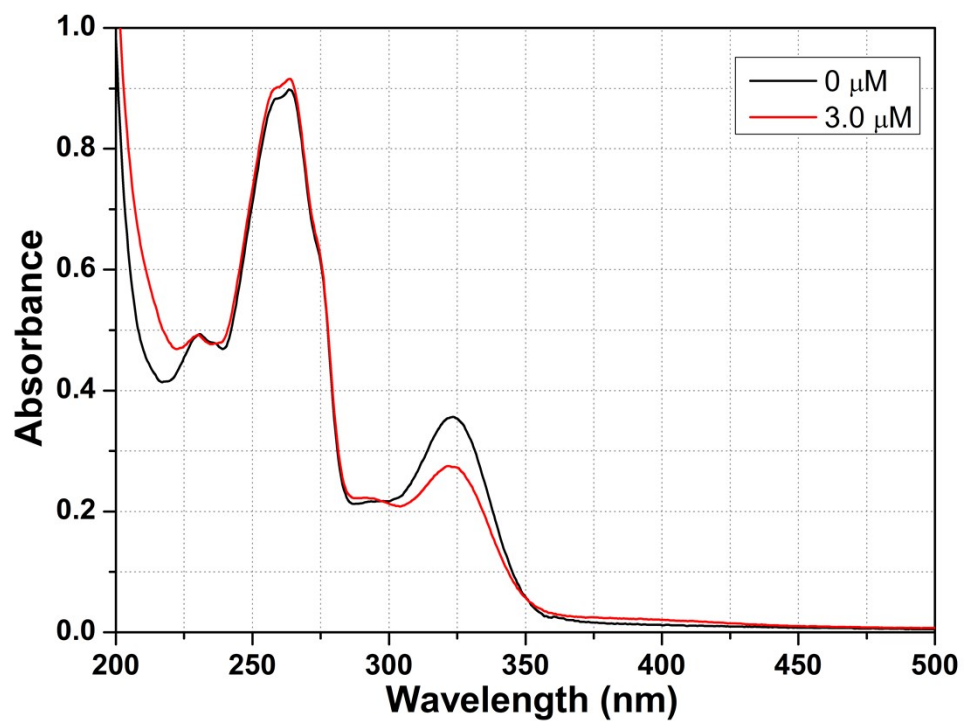

Fig. S12: Absorption of compound Cd\_1 and changes in spectra after the addition of Al<sup>3+</sup> (3 μM).

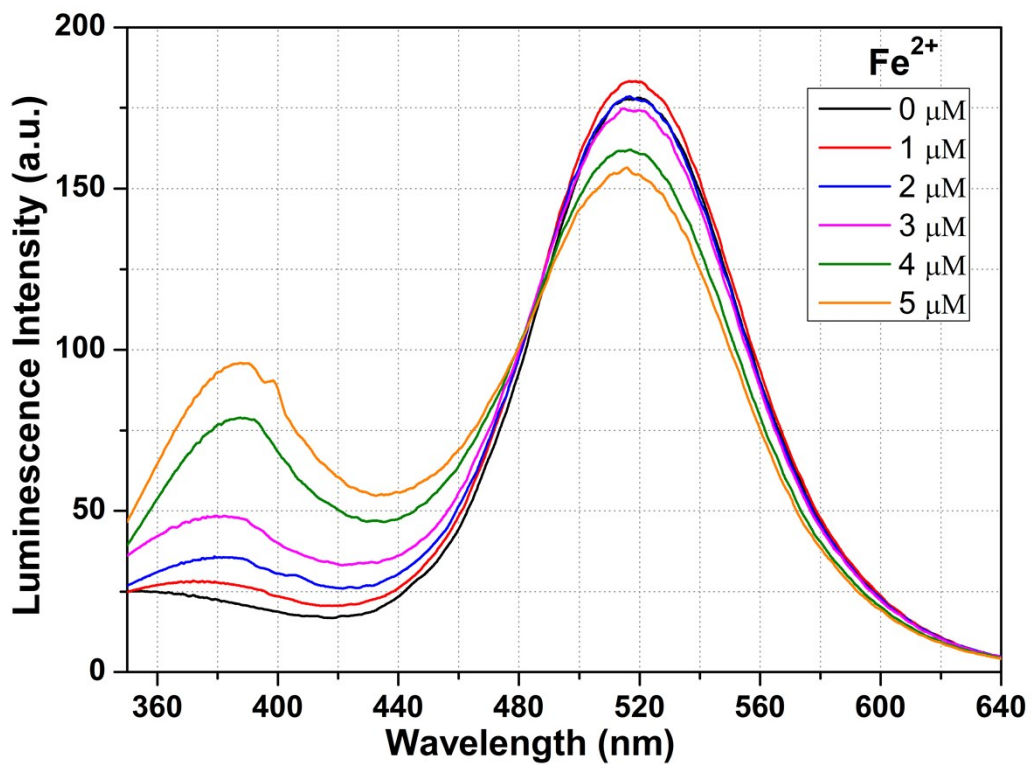

Fig. S13: Emission spectra of compound Cd<sub>1</sub> dispersed in water upon incremental addition of Fe<sup>2+</sup> solution ( $\lambda_{\text{ex}} = 330$  nm). Final concentration of Fe<sup>2+</sup> in the medium is indicated in the legend.

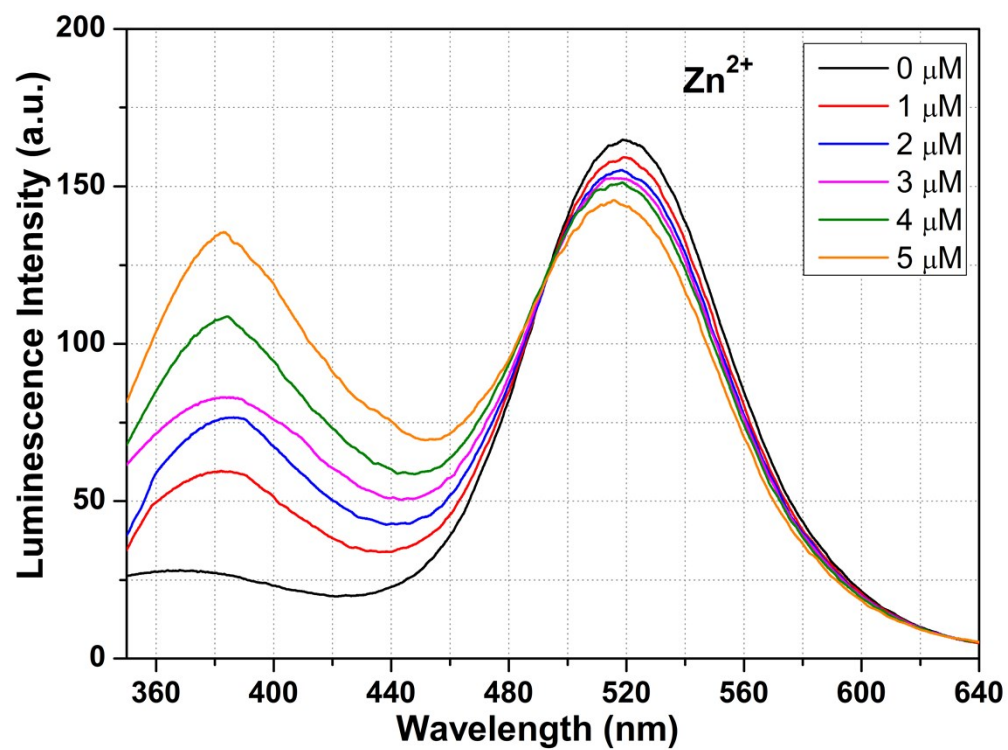

Fig. S14: Emission spectra of compound **Cd<sub>1</sub>** dispersed in water upon incremental addition of Zn<sup>2+</sup> solution ( $\lambda_{\text{ex}} = 330 \text{ nm}$ ). Final concentration of Zn<sup>2+</sup> in the medium is indicated in the legend.



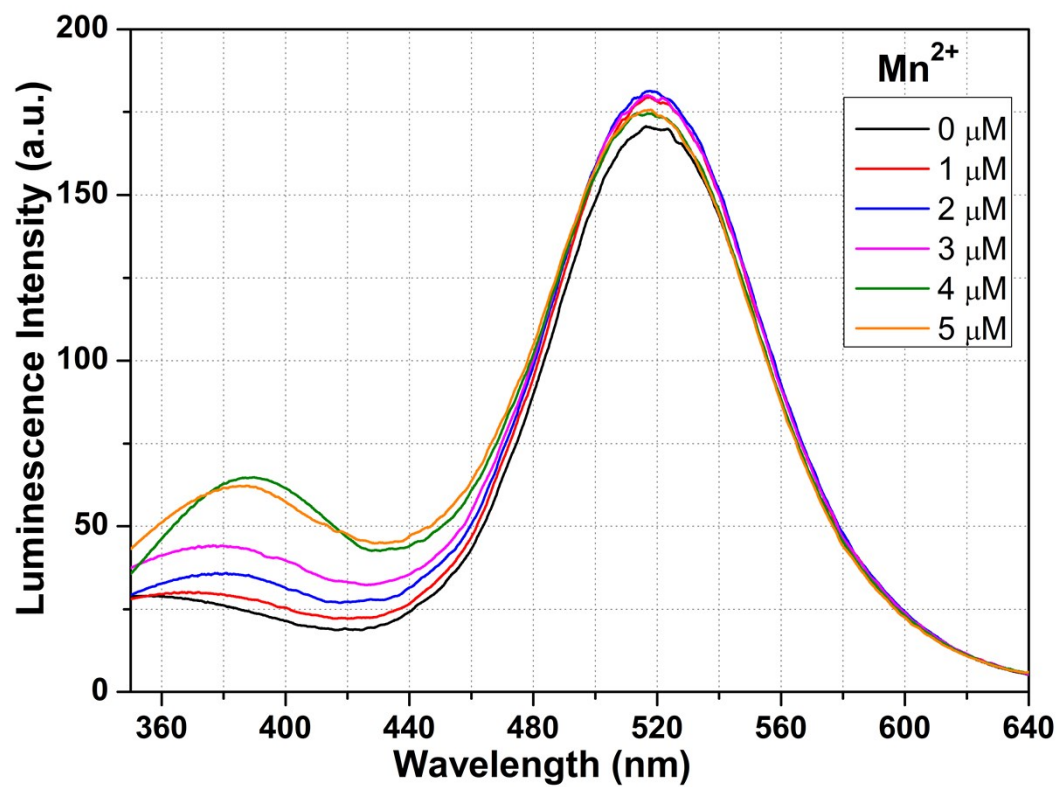

Fig. S15: Emission spectra of compound Cd<sub>1</sub> dispersed in water upon incremental addition of Mn<sup>2+</sup> solution ( $\lambda_{\text{ex}} = 330$  nm). Final concentration of Mn<sup>2+</sup> in the medium is indicated in the legend.

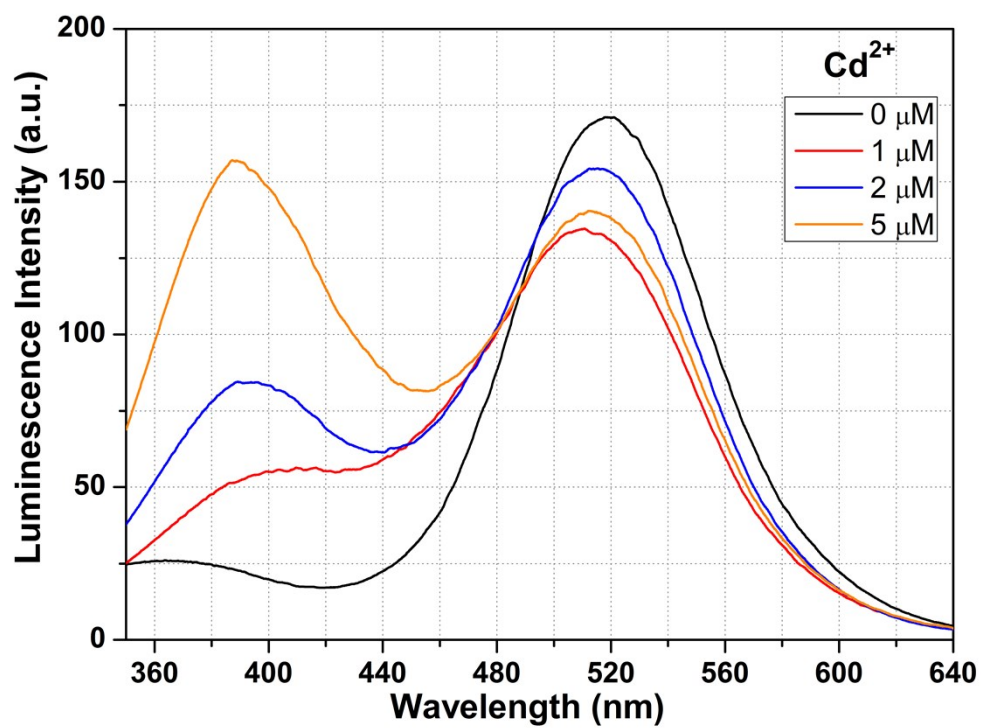

Fig. S16: Emission spectra of compound **Cd<sub>1</sub>** dispersed in water upon incremental addition of Cd<sup>2+</sup> solution ( $\lambda_{\text{ex}} = 330$  nm). Final concentration of Cd<sup>2+</sup> in the medium is indicated in the legend.

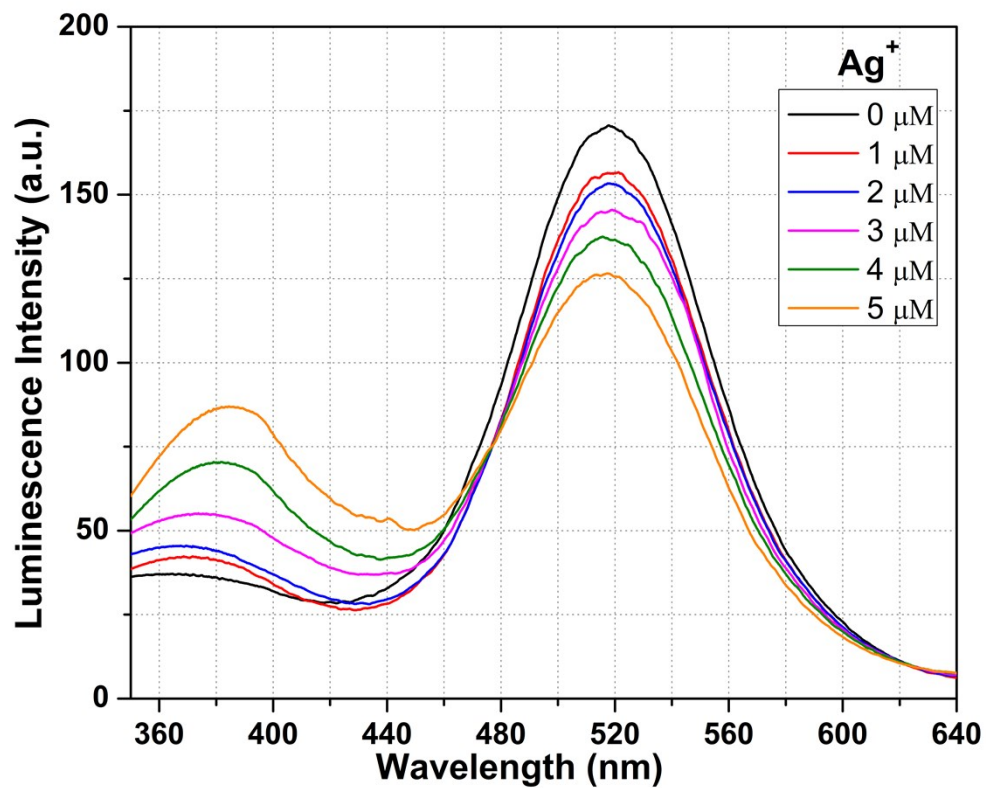

Fig. S17: Emission spectra of compound Cd<sub>1</sub> dispersed in water upon incremental addition of Ag<sup>+</sup> solution ( $\lambda_{\text{ex}} = 330$  nm). Final concentration of Ag<sup>+</sup> in the medium is indicated in the legend.

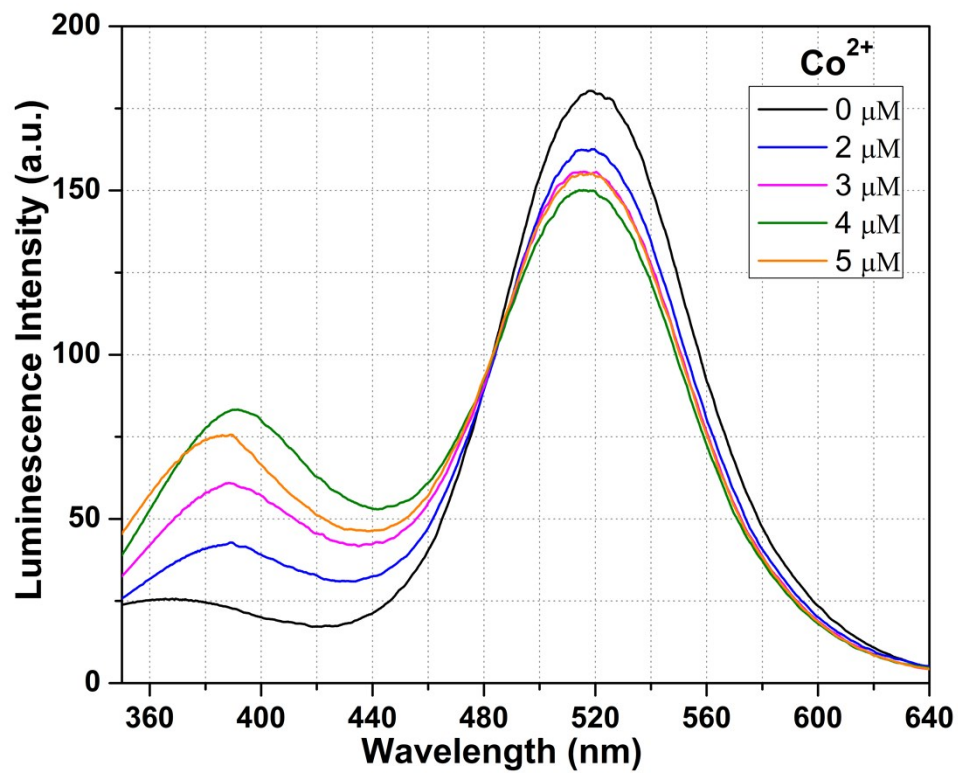

Fig. S18: Emission spectra of compound **Cd<sub>1</sub>** dispersed in water upon incremental addition of Co<sup>2+</sup> solution ( $\lambda_{\text{ex}} = 330$  nm). Final concentration of Co<sup>2+</sup> in the medium is indicated in the legend.

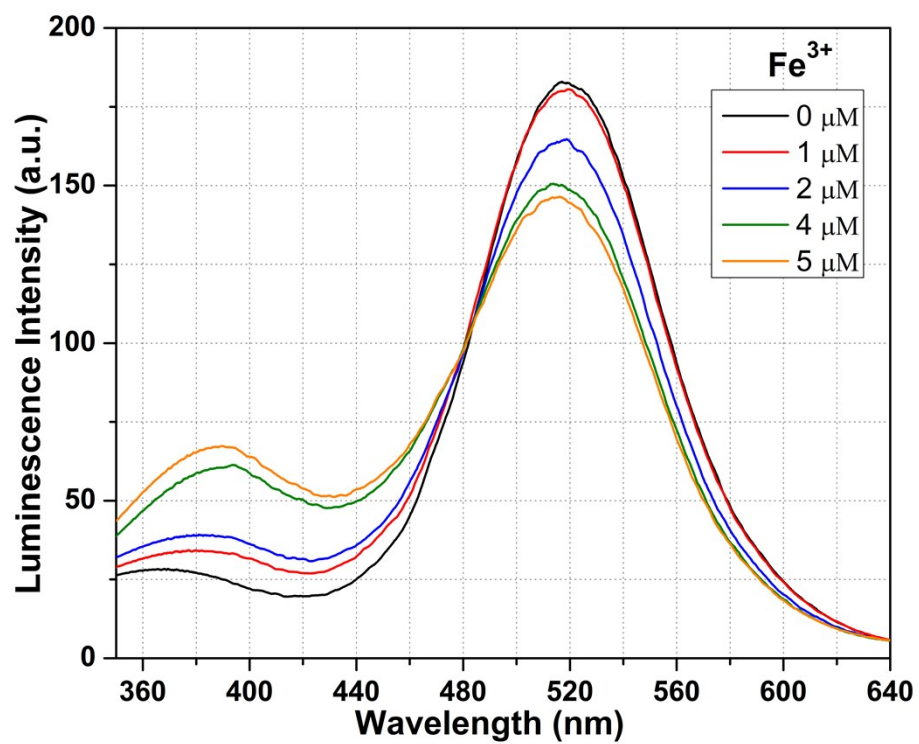

Fig. S19: Emission spectra of compound Cd<sub>1</sub> dispersed in water upon incremental addition of Fe<sup>3+</sup> solution ( $\lambda_{\text{ex}}$  = 330 nm). Final concentration of Fe<sup>3+</sup> in the medium is indicated in the legend.

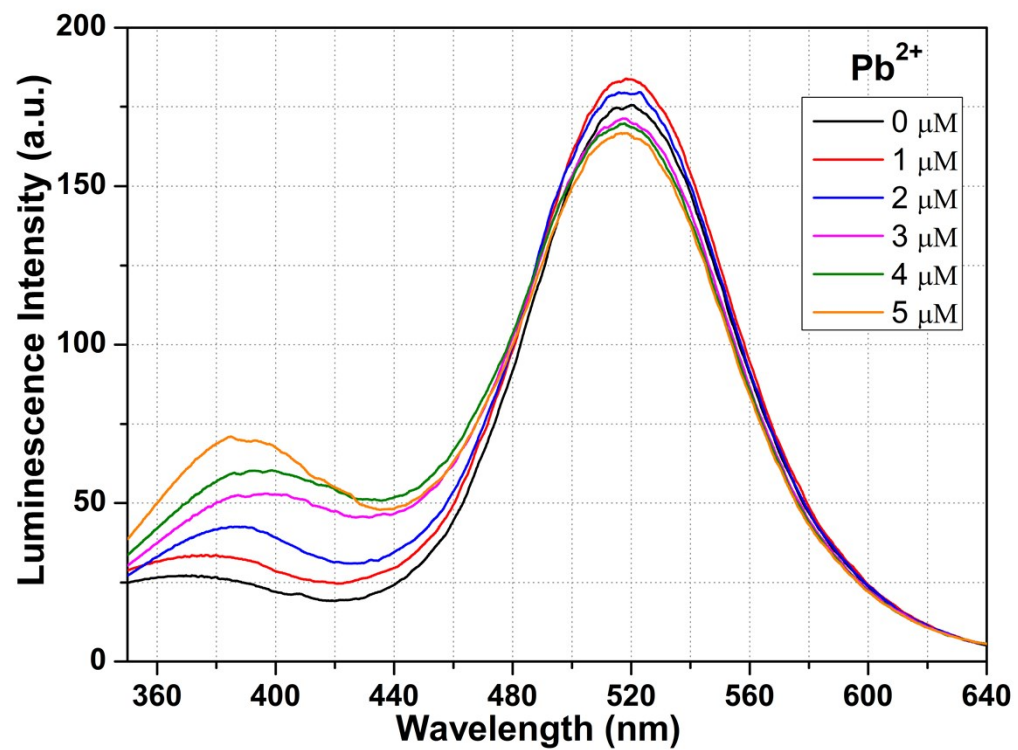

Fig. S20: Emission spectra of compound Cd<sub>1</sub> dispersed in water upon incremental addition of Pb<sup>2+</sup> solution ( $\lambda_{\text{ex}} = 330$  nm). Final concentration of Pb<sup>2+</sup> in the medium is indicated in the legend.

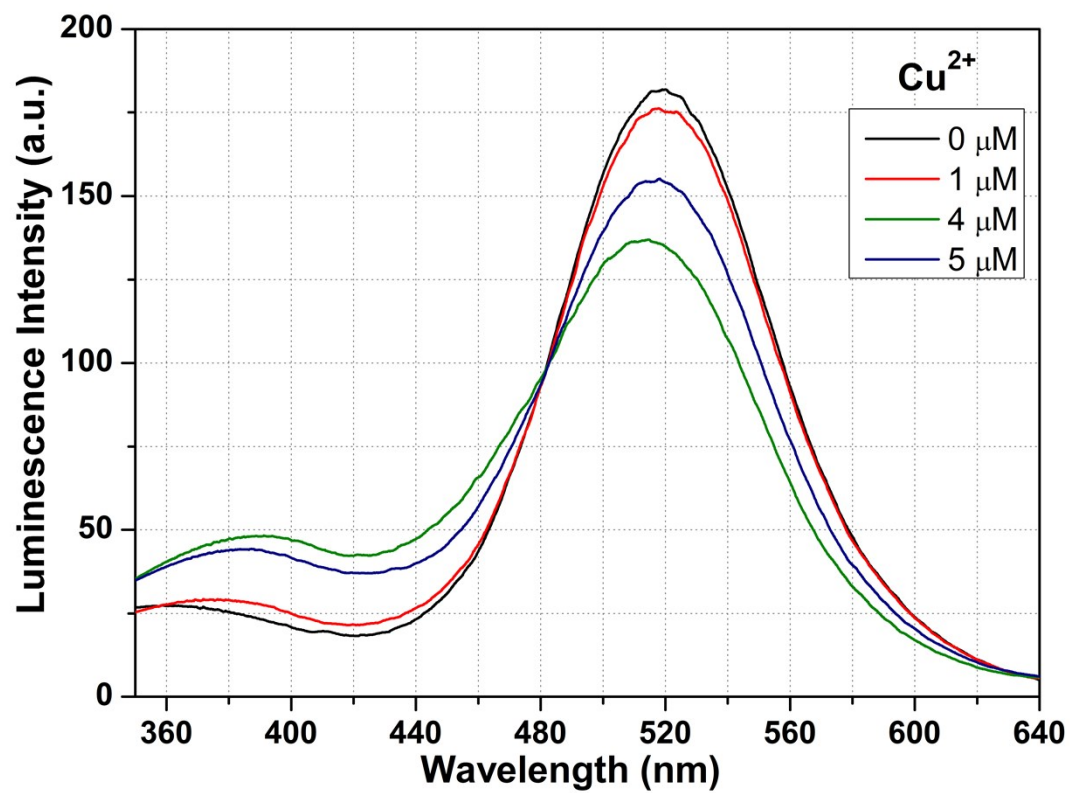

Fig. S21: Emission spectra of compound **Cd<sub>1</sub>** dispersed in water upon incremental addition of Cu<sup>2+</sup> solution ( $\lambda_{\text{ex}} = 330$  nm). Final concentration of Cu<sup>2+</sup> in the medium is indicated in the legend.

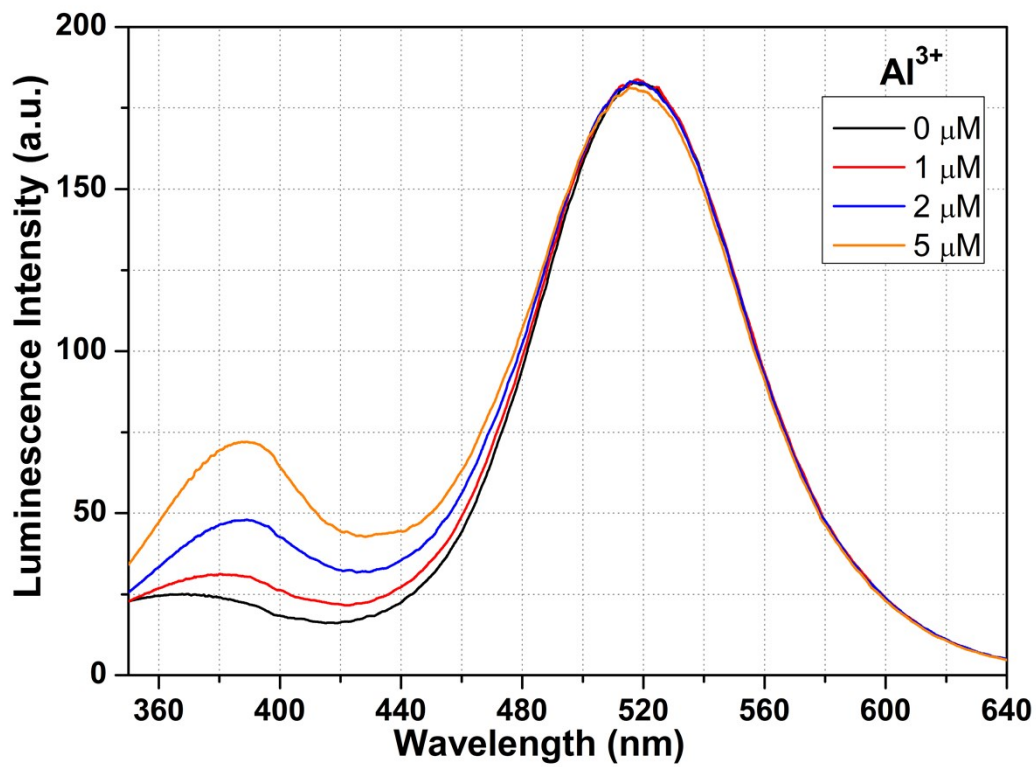

Fig. S22: Emission spectra of compound Cd<sub>1</sub> dispersed in water upon incremental addition of Al<sup>3+</sup> solution ( $\lambda_{\text{ex}}$  = 330 nm). Final concentration of Al<sup>3+</sup> in the medium is indicated in the legend.



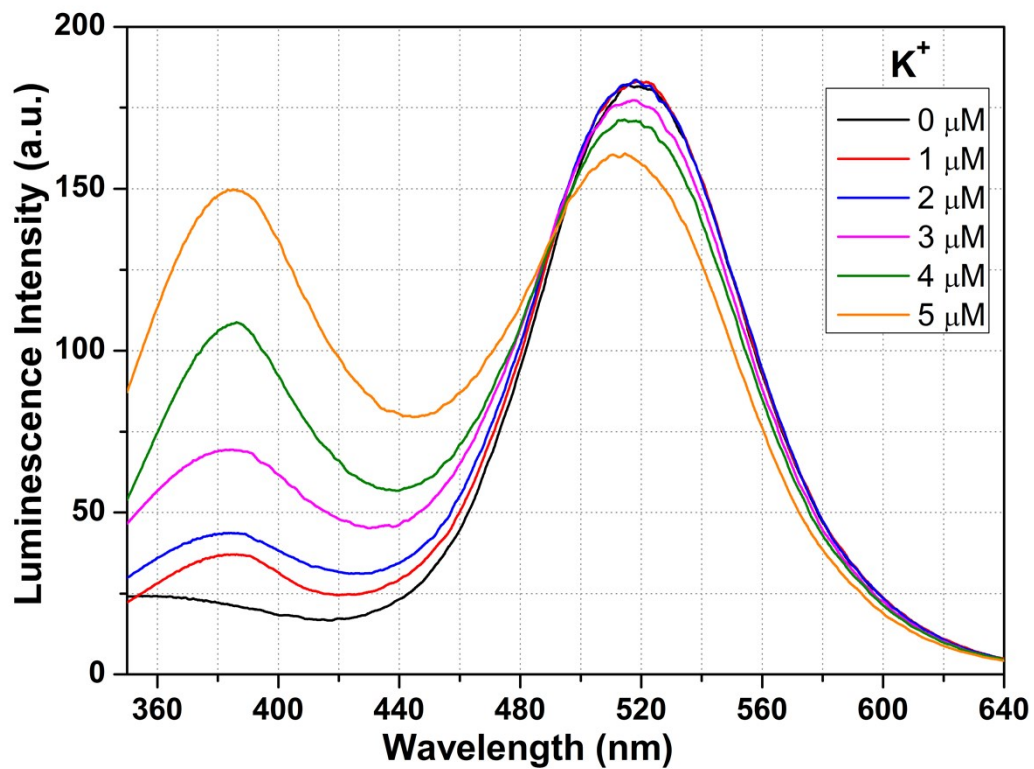

Fig. S23: Emission spectra of compound Cd<sub>1</sub> dispersed in water upon incremental addition of K<sup>+</sup> solution ( $\lambda_{\text{ex}}$  = 330 nm). Final concentration of K<sup>+</sup> in the medium is indicated in the legend.

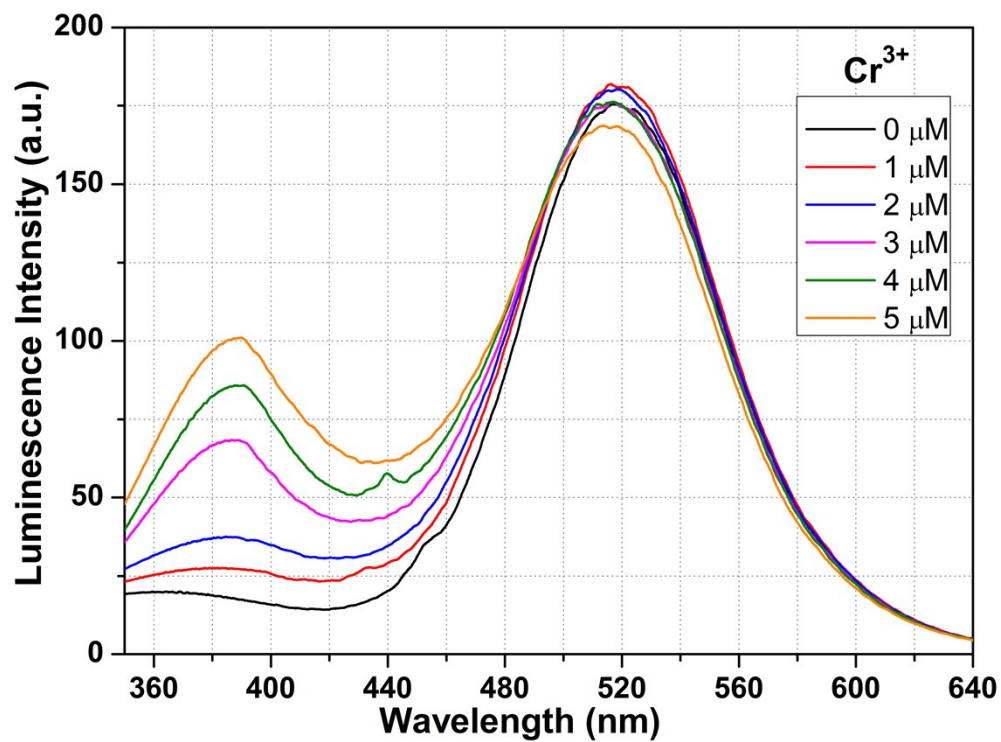

Fig. S24: Emission spectra of compound Cd<sub>1</sub> dispersed in water upon incremental addition of Cr<sup>3+</sup> solution ( $\lambda_{\text{ex}}$  = 330 nm). Final concentration of Cr<sup>3+</sup> in the medium is indicated in the legend.

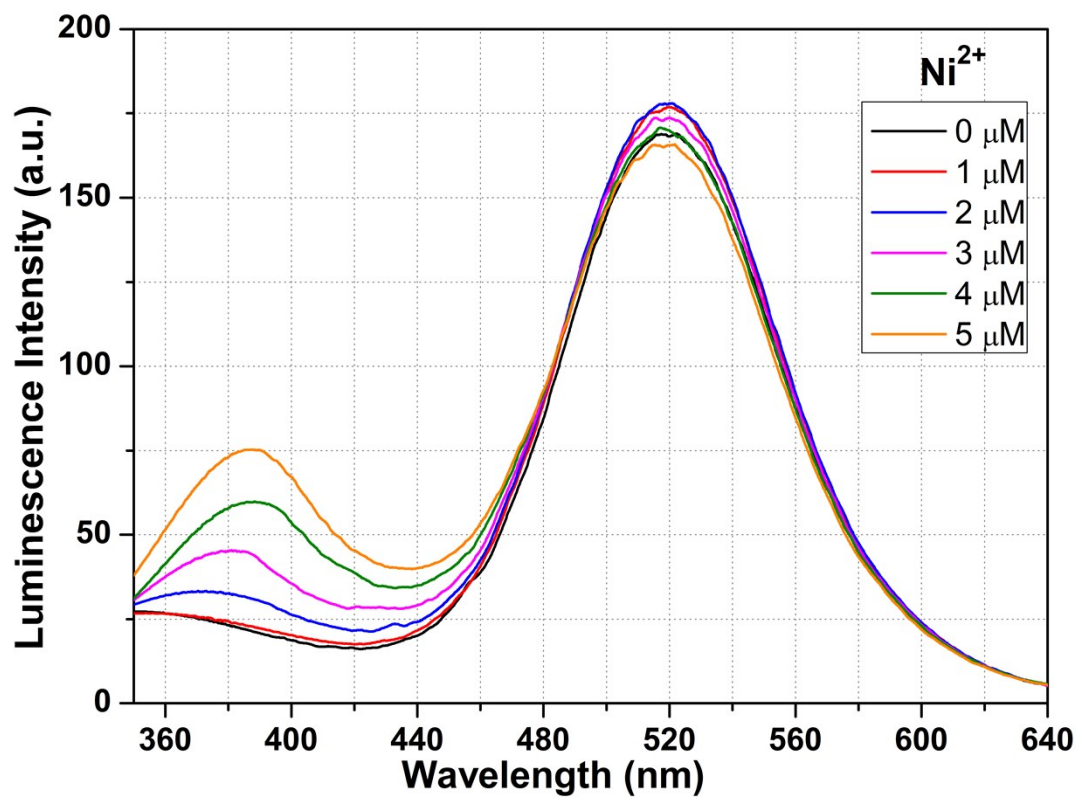

Fig. S25: Emission spectra of compound Cd<sub>1</sub> dispersed in water upon incremental addition of Ni<sup>2+</sup> solution ( $\lambda_{\text{ex}}$  = 330 nm). Final concentration of Ni<sup>2+</sup> in the medium is indicated in the legend.

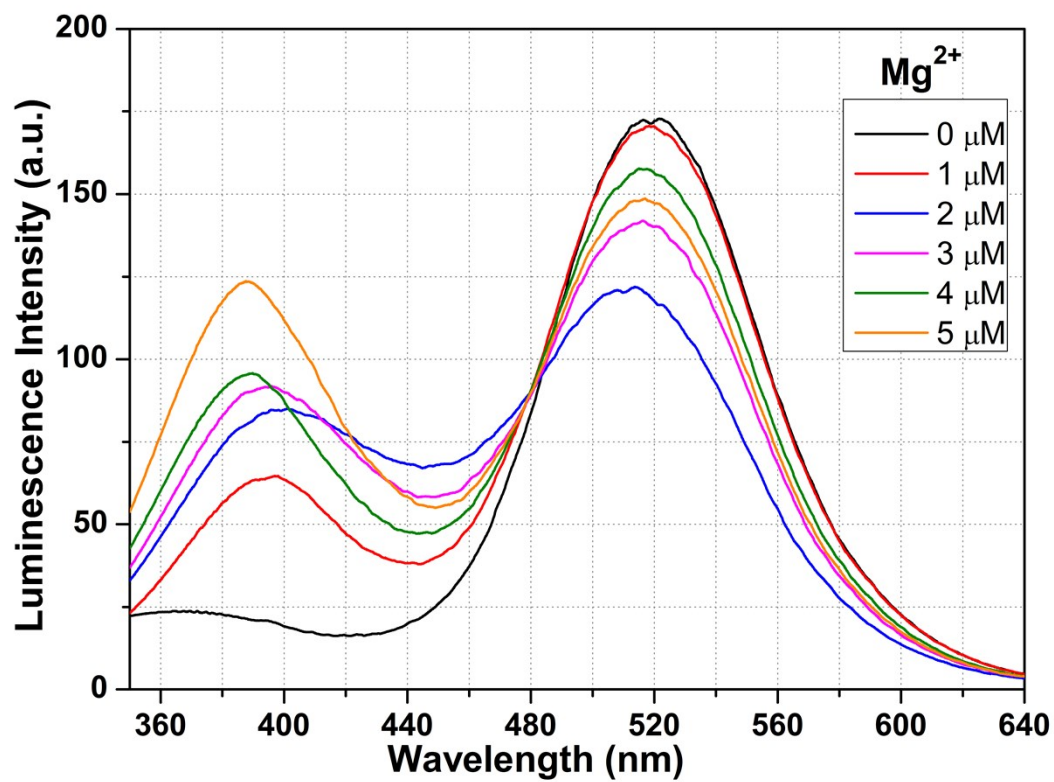

Fig. S26: Emission spectra of compound Cd<sub>1</sub> dispersed in water upon incremental addition of Mg<sup>2+</sup> solution ( $\lambda_{\text{ex}} = 330 \text{ nm}$ ). Final concentration of Mg<sup>2+</sup> in the medium is indicated in the legend.

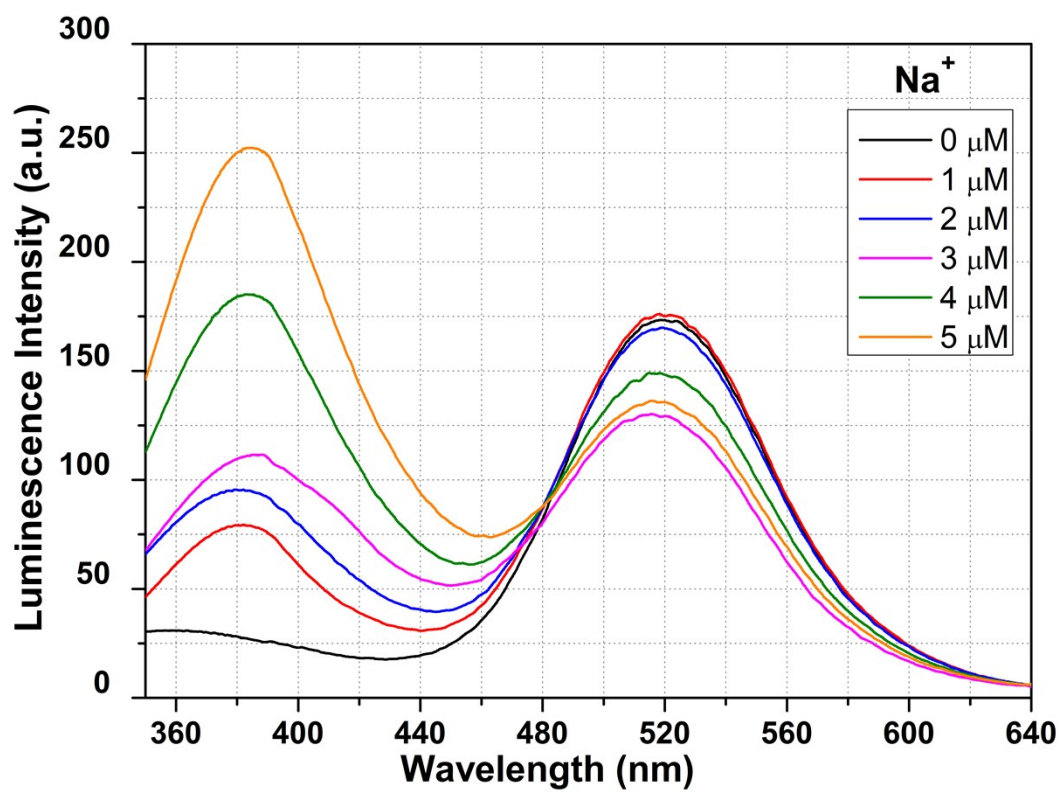

Fig. S27: Emission spectra of compound Cd<sub>1</sub> dispersed in water upon incremental addition of Na<sup>+</sup> solution ( $\lambda_{\text{ex}}$  = 330 nm). Final concentration of Na<sup>+</sup> in the medium is indicated in the legend.

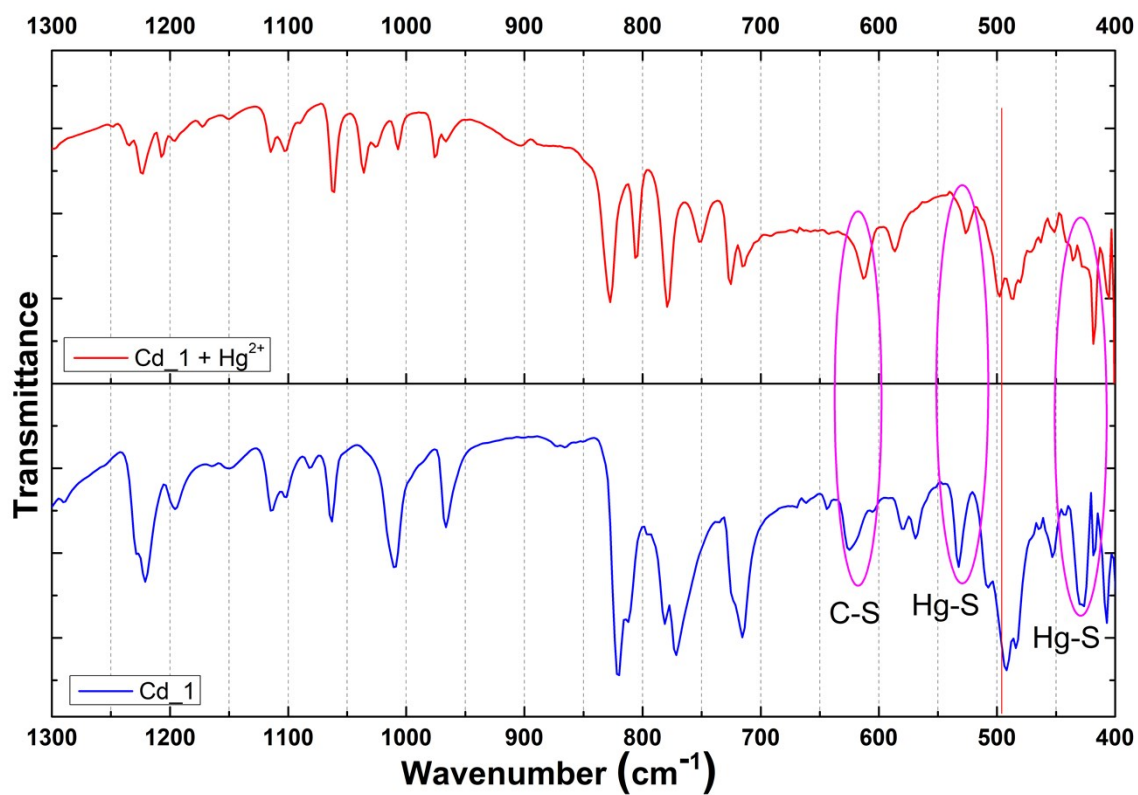

Fig. S28: Blue line shows the IR spectra of compound **1**. Red line shows the IR spectra of **Cd\_1** after the addition  $\text{Hg}^{2+}$  ions. The encircled areas are a visual guide to point out the changes in IR peaks after the addition of  $\text{Hg}^{2+}$  ions.

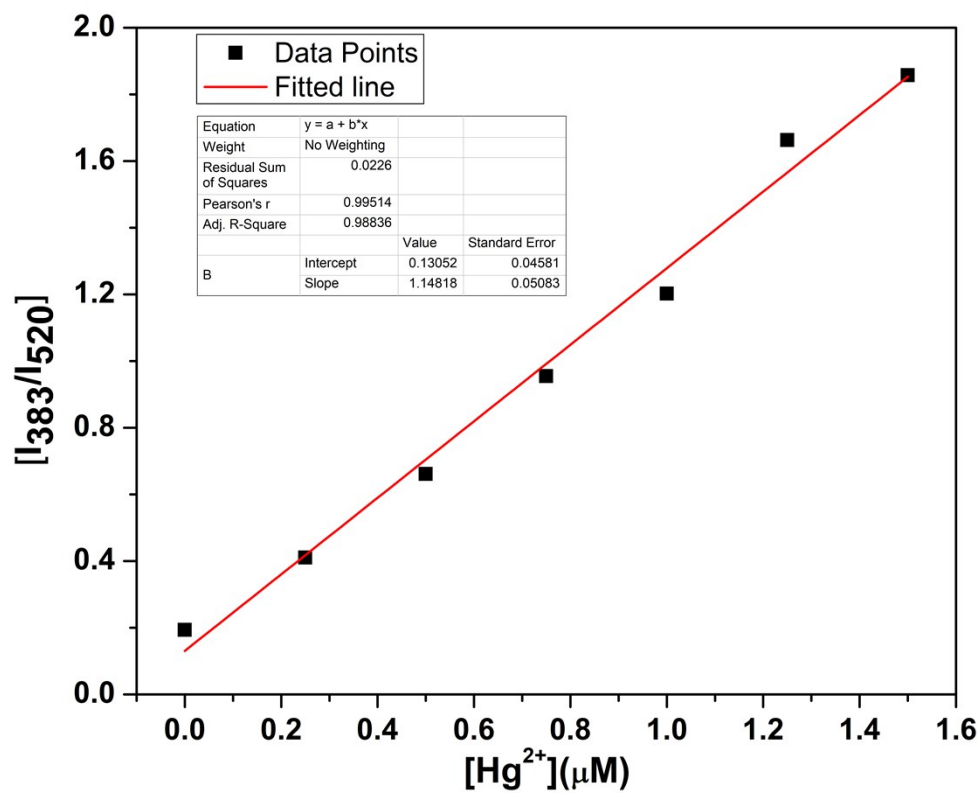

Fig. S29: Plot of ratio of luminescence intensity at 383 nm and 520 nm of compound **Cd<sub>1</sub>** upon addition of Hg<sup>2+</sup> in low concentration region. Red line is the linear fitted line of experimental data points ( $R^2 = 0.99514$ ) and the slope of the graph is 1.148.

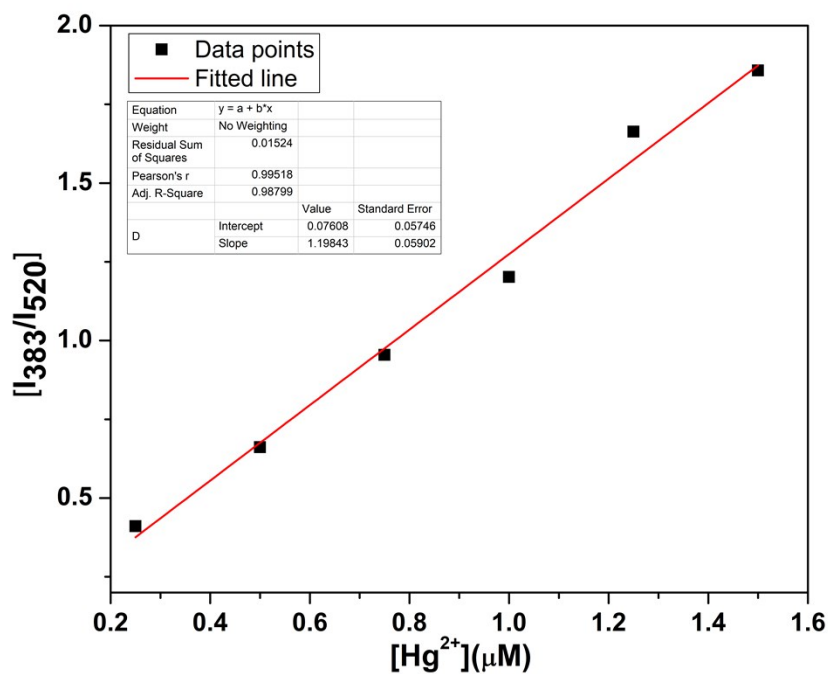

Fig. S30: Plot of ratio of luminescence intensity at 383 nm and 520 nm of compound **Cd\_1** upon addition of  $\text{Hg}^{2+}$  in low concentration region. Red line is the linear fitted line of experimental data points ( $R^2 = 0.99518$ ) and the slope of the graph is 1.198.

#### Calculation of Detection Limit

Standard deviation for compound **Cd\_1**

| Blank Reading (only compound <b>Cd_1</b> ) | Fluorescence Intensity Ratio |
|--------------------------------------------|------------------------------|
| Reading 1                                  | 0.10                         |
| Reading 2                                  | 0.12                         |
| Reading 3                                  | 0.13                         |
| Reading 4                                  | 0.12                         |
| Reading 5                                  | 0.14                         |
| Standard deviation( $\sigma$ )             | 0.015                        |

|                                 |                         |
|---------------------------------|-------------------------|
| Standard Deviation ( $\sigma$ ) | 0.015                   |
| Slope from Graph (m)            | 1.20 $\mu\text{M}^{-1}$ |

Thus, Limit of Detection (LOD) =  $3\sigma/m = (3 \times 0.015)/1.20 = 37.5 \text{ nM} = 7.4 \text{ ppb}$



**Table S3:** Summary of some reported metal-organic compounds for the detection of Hg<sup>2+</sup> in an aqueous medium.

| Sl. No | Sensor                                                                                                                                   | K <sub>SV</sub> (M <sup>-1</sup> ) | Detection Limit | Luminescence response | Ref.      |
|--------|------------------------------------------------------------------------------------------------------------------------------------------|------------------------------------|-----------------|-----------------------|-----------|
| 1      | [Cd(2-NH <sub>2</sub> bdc) (tib)·4H <sub>2</sub> O·0.5DMA] <sub>n</sub>                                                                  | 13 × 10 <sup>5</sup>               | 42 nM           | Quenching             | s1        |
| 2      | Ad/Tb/DPA                                                                                                                                | NA                                 | 0.2 nM          | Enhancement           | s2        |
| 3      | {[Cd <sub>1.5</sub> (C <sub>18</sub> H <sub>10</sub> O <sub>10</sub> )]·(H <sub>3</sub> O)(H <sub>2</sub> O) <sub>3</sub> } <sub>n</sub> | 4.3 × 10 <sup>3</sup>              | 2 nM            | Ratiometric           | s3        |
| 4      | Tb-CIP/AMP                                                                                                                               | NA                                 | 0.16 nM         | Quenching             | s4        |
| 5      | TbL <sub>1.5</sub> (H <sub>2</sub> O) <sub>2</sub> ·H <sub>2</sub> O                                                                     | 7.4 × 10 <sup>3</sup>              | NA              | Quenching             | s5        |
| 6      | Zr <sub>6</sub> O <sub>4</sub> (OH) <sub>4</sub> (TCPP) <sub>1.5</sub>                                                                   | 6.4 × 10 <sup>5</sup>              | 6 nM            | Quenching             | s6        |
| 7      | Eu/IPA-Im                                                                                                                                | NA                                 | 2 nM            | Enhancement           | s7        |
| 8      | [Zn(μ <sub>2</sub> -1H-ade)(μ <sub>2</sub> -SO <sub>4</sub> )] <sub>n</sub>                                                              | 7.7 × 10 <sup>3</sup>              | 70 nM           | Quenching             | s8        |
| 9      | Zn-based MOF                                                                                                                             | 3737                               | 1.8 μM          | Enhancement           | s9        |
| 10     | Ln(TATAB)·(DMF) <sub>4</sub> (H <sub>2</sub> O)(MeOH) <sub>0.5</sub>                                                                     | 4851                               | 4.4 nM          | Quenching             | s10       |
| 11     | {[Zn(4,4'-AP)(5-AIA)]·(DMF) <sub>0.5</sub> } <sub>n</sub>                                                                                | 1.01 × 10 <sup>9</sup>             | 9.9 pM          | Quenching             | s11       |
| 12     | [Pb <sub>2</sub> (2-NCP) <sub>2</sub> (L <sub>1</sub> )] <sub>n</sub>                                                                    | 4.28 × 10 <sup>5</sup>             | 1.3 ppm         | Quenching             | s12       |
| 13     | [Cd(C <sub>5</sub> N <sub>1</sub> S <sub>1</sub> H <sub>4</sub> )(C <sub>6</sub> O <sub>5</sub> H <sub>3</sub> )]                        | 1.15 × 10 <sup>6</sup>             | 37.5 nM         | Ratiometric           | This work |

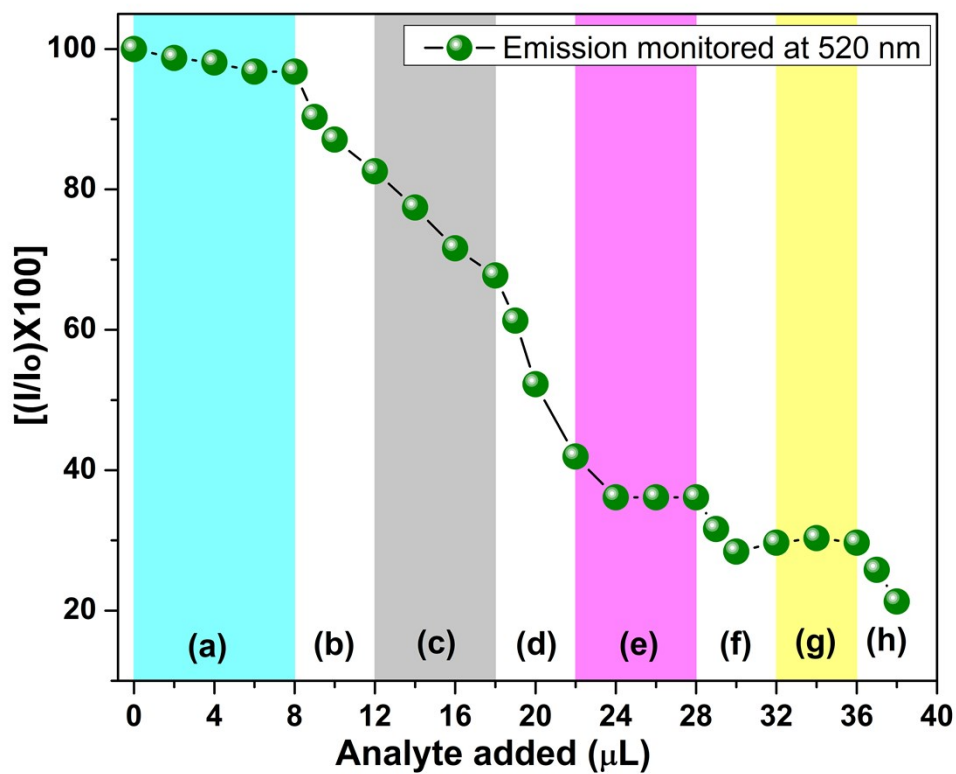

Fig. S31: Change of percentage in luminescence intensity at 520 nm upon the addition of 2  $\mu\text{L}$  1 mM quenchable metal ions followed by the addition of  $\text{Hg}^{2+}$  solution (two steps, 1  $\mu\text{L}$  + 1  $\mu\text{L}$ ) and so on. The shaded portion represents the addition of  $\text{Hg}^{2+}$  in two steps. The added solution of metal ions are as below: (a) blank + 2  $\mu\text{L}$   $\text{Fe}^{3+}$  + 2  $\mu\text{L}$   $\text{Cr}^{3+}$  + 2  $\mu\text{L}$   $\text{Al}^{3+}$  + 2  $\mu\text{L}$   $\text{Pb}^{2+}$ , (b) a + 2  $\mu\text{L}$   $\text{Hg}^{2+}$ , (c) b + 2  $\mu\text{L}$   $\text{Zn}^{2+}$  + 2  $\mu\text{L}$   $\text{Cd}^{2+}$  + 2  $\mu\text{L}$   $\text{Ag}^{+}$  + 2  $\mu\text{L}$   $\text{Cu}^{2+}$ , (d) c + 2  $\mu\text{L}$   $\text{Hg}^{2+}$  (e) d + 2  $\mu\text{L}$   $\text{Mn}^{2+}$  + 2  $\mu\text{L}$   $\text{Fe}^{2+}$  + 2  $\mu\text{L}$   $\text{Co}^{2+}$  + 2  $\mu\text{L}$   $\text{Ni}^{2+}$ , (f) e + 2  $\mu\text{L}$   $\text{Hg}^{2+}$  (g) f + 2  $\mu\text{L}$   $\text{Mg}^{2+}$  + 2  $\mu\text{L}$   $\text{K}^{+}$  + 2  $\mu\text{L}$   $\text{Na}^{+}$ , (h) a + 2  $\mu\text{L}$   $\text{Hg}^{2+}$ .

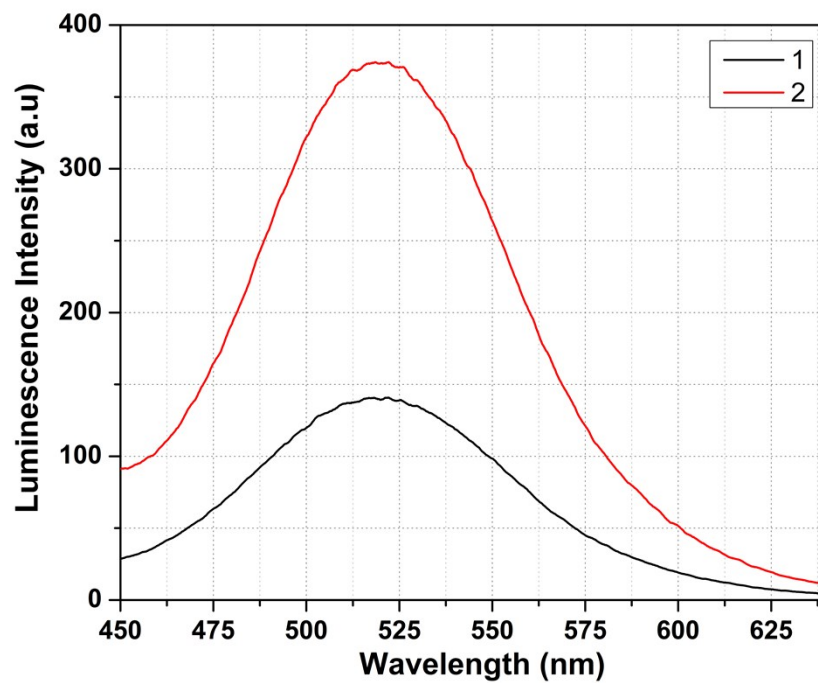

Fig. S32: (1) Luminescence spectrum of compound Cd<sub>1</sub> (2) luminescence spectrum of compound Cd<sub>1</sub> after passing Argon gas for 10 minutes upon excitation at 330 nm.

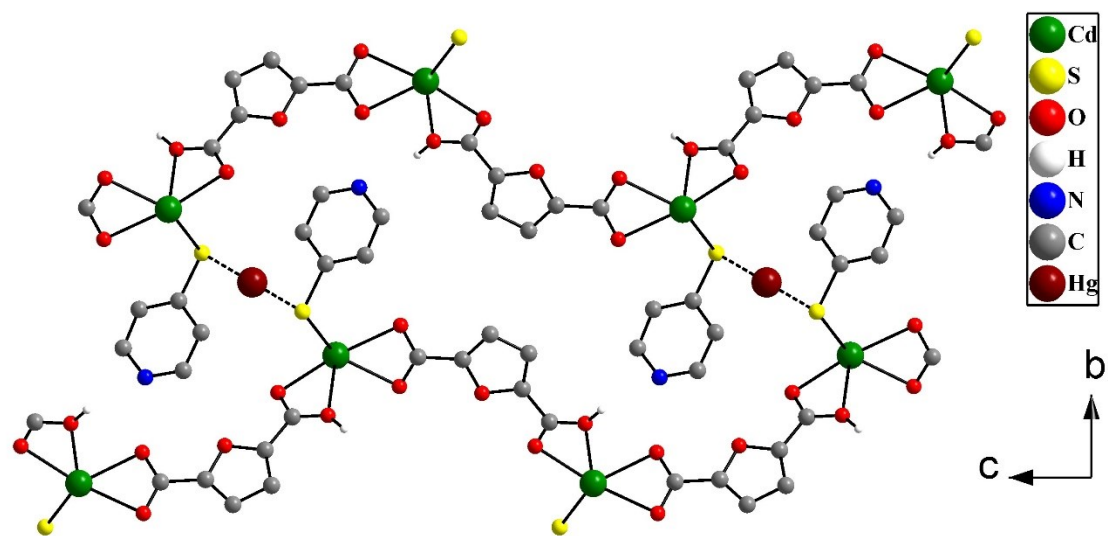

Fig. S33: Possible interactions between Hg<sup>2+</sup> ions and Cd<sub>1</sub> with two S atoms of the 4MPy moiety of two adjacent 1D chain.

## REFERENCES

- S1. Wen, L.; Zheng, X.; Lv, K.; Wang, C.; Xu, X., Two amino-decorated metal–organic frameworks for highly selective and quantitatively sensing of Hg(II) and Cr(VI) in aqueous solution. *Inorg. Chem.* **2015**, *54* (15), 7133-7135.
- S2. Tan, H.; Liu, B.; Chen, Y., Lanthanide coordination polymer nanoparticles for sensing of mercury (II) by photoinduced electron transfer. *ACS nano* **2012**, *6* (12), 10505-10511.
- S3. Wu, P.; Liu, Y.; Liu, Y.; Wang, J.; Li, Y.; Liu, W.; Wang, J., Cadmium-Based Metal–Organic Framework as a Highly Selective and Sensitive Ratiometric Luminescent Sensor for Mercury(II). *Inorg. Chem.* **2015**, *54* (23), 11046-11048.
- S4. Liu, B.; Huang, Y.; Zhu, X.; Hao, Y.; Ding, Y.; Wei, W.; Wang, Q.; Qu, P.; Xu, M., Smart lanthanide coordination polymer fluorescence probe for mercury (II) determination. *Anal. Chim. Acta* **2016**, *912*, 139-145.
- S5. Zhu, Y.-M.; Zeng, C.-H.; Chu, T.-S.; Wang, H.-M.; Yang, Y.-Y.; Tong, Y.-X.; Su, C.-Y.; Wong, W.-T., A novel highly luminescent LnMOF film: a convenient sensor for Hg<sup>2+</sup> detecting. *J. Mater. Chem. A* **2013**, *1* (37), 11312-11319.
- S6. Yang, J.; Wang, Z.; Li, Y.; Zhuang, Q.; Zhao, W.; Gu, J., Porphyrinic MOFs for reversible fluorescent and colorimetric sensing of mercury (II) ions in aqueous phase. *RSC Adv.* **2016**, *6* (74), 69807-69814.
- S7. Li, Q.; Wang, C.; Tan, H.; Tang, G.; Gao, J.; Chen, C.-H., A turn on fluorescent sensor based on lanthanide coordination polymer nanoparticles for the detection of mercury (II) in biological fluids. *RSC Adv.* **2016**, *6* (22), 17811-17817.
- S8. Rachuri, Y.; Parmar, B.; Bisht, K. K.; Suresh, E., Multiresponsive adenine-based luminescent Zn (II) coordination polymer for detection of Hg<sup>2+</sup> and trinitrophenol in aqueous media. *Cryst. Growth Des.* **2017**, *17* (3), 1363-1372.
- S9. Razavi, S. A. A.; Masoomi, M. Y.; Morsali, A., Double Solvent Sensing Method for Improving Sensitivity and Accuracy of Hg(II) Detection Based on Different Signal Transduction of a Tetrazine-Functionalized Pillared Metal–Organic Framework. *Inorg. Chem.* **2017**, *56* (16), 9646-9652.
- S10. Xia, T.; Song, T.; Zhang, G.; Cui, Y.; Yang, Y.; Wang, Z.; Qian, G., A Terbium Metal–Organic Framework for Highly Selective and Sensitive Luminescence Sensing of Hg<sup>2+</sup> Ions in Aqueous Solution. *Chem. Eur. J.* **2016**, *22* (51), 18429-18434.
- S11. Pankajakshan, A.; Kuznetsov, D.; Mandal, S., Ultrasensitive Detection of Hg(II) Ions in Aqueous Medium Using Zinc-Based Metal–Organic Framework. *Inorg. Chem.* **2019**, *58* (2), 1377-1381.
- S12. Qiao, Y.; Guo, J.; Li, D.; Li, H.; Xue, X.; Jiang, W.; Che, G.; Guan, W., Fluorescent sensing response of metal-organic frameworks for the highly sensitive detection of Hg<sup>2+</sup> and nitrobenzene in aqueous media. *J. Solid State Chem.* **2020**, *290*, 121610.
